# Supplementary material for: Relational coordination amongst health professionals involved in insulin initiation for people with type 2 diabetes in general practice: an exploratory survey
Source: Springer Nature journal article supplement (doi:10.1186/s12913-014-0515-3), 2014-10-31
Supplement: MOESM5 [file 9756612]

Table 1: Descriptions of models of care

| **Model of care** | **Description** |
| --- | --- |
| General practice based care | Initiation and management of insulin by a GP +/- the assistance of a practice nurse |
| GP with a special interest in diabetes | GP that provides a clinical service beyond the scope of conventional general practice and can receive referrals from other GPs |
| Diabetes nurse educator (DNE) | Referral to a DNE to initiate and manage insulin in conjunction with a GP |
| Specialist shared care | Referral to a specialist (general physician or endocrinologist +/- DNE) for a one off consultation and provision of a management plan so that the GP can manage insulin |
| Specialist outreach | Referral to a specialist (general physician or endocrinologist +/- DNE) who conducts sessions within a general practice clinic |
| Specialist routine care | Referral to a specialist (general physician or endocrinologist +/- DNE) to take on primary responsibility of insulin initiation and ongoing management |
