# Supplementary material for: Relational coordination amongst health professionals involved in insulin initiation for people with type 2 diabetes in general practice: an exploratory survey
Source: Springer Nature journal article supplement (doi:10.1186/s12913-014-0515-3), 2014-10-31
Supplement: MOESM6 [file 9756612]

Table 2: Relational coordination survey questions

Respondents were asked to respond to each question by rating GPs, practice nurses, DNE and physician on a 5 point Likert scale.

| Relational coordination domain | Survey question |
| --- | --- |
| Frequent communication | How frequently do the care providers in each of these groups communicate with you about people with type 2 diabetes who are identified as requiring insulin in the general practice setting? |
| Timely communication | Do the care providers in each of these groups communicate with you in a timely way about people with type 2 diabetes who are identified as requiring insulin in the general practice setting? |
| Accurate communication | Do the care providers in each of these groups communicate with you accurately about people with type 2 diabetes who are identified as requiring insulin in the general practice setting? |
| Problem solving communication | When problems occur in people with type 2 diabetes who are identified as requiring insulin in the general practice setting, do the care providers in each of these groups blame others or work with you to solve the problem? |
| Shared goals | How much do the care providers in each of these groups share your goals for people with type 2 diabetes who are identified as requiring insulin in the general practice setting? |
| Shared knowledge | How much do the care providers in each of these groups know about the work you do with people with type 2 diabetes who are identified as requiring insulin in the general practice setting? |
| Mutual respect | How much do the care providers in each of these groups respect your work or role in people with type 2 diabetes who are identified as requiring insulin in the general practice setting? |
