# Supplementary material for: Relational coordination amongst health professionals involved in insulin initiation for people with type 2 diabetes in general practice: an exploratory survey
Source: Springer Nature journal article supplement (doi:10.1186/s12913-014-0515-3), 2014-10-31
Supplement: MOESM7 [file 9756612]

Table 3: Demographics of survey respondents

| **Professional group** | | **Physician** | **Diabetes nurse educator (DNE)** | **General practitioner (GP)** | **Practice nurse** | **Total** |
| --- | --- | --- | --- | --- | --- | --- |
| **Number returned (% of total respondents)** | | 27 (15.1%) | 62[[1]](#footnote-1) (34.6%) | 46 (25.7%) | 44 (24.6%) | **179** |
| **Years in practice**  **median (interquartile range)** | | 12.5 (5.5-20) | 10 (5-20) | 22 (18-30) | 5 (3-10) |  |
| **Setting worked within**  **Number (% of health professional group)** | **Outpatients** | 18 (67%) | 24 (38%) | 1 (2.2%) | 0 (0%) |  |
| **CHC** | 1 (3.7%) | 20 (32%) | 7 (15%) | 2 (4.7%) |
| **Private** | 17 (63%) | 15 (24%) | 1 (2.2%) | 3 (7.0%) |
| **General Practice** | 0 (0%) | 22 (35%) | 38 (83%) | 38 (88%) |
| **Primary location of work**  **(RA level[**[**57**](#_ENREF_57)**][[2]](#footnote-2))**  **Number (% of health professional group)** | **1** | 17 (63%) | 29 (46%) | 31 (67%) | 30 (70%) |  |
| **2** | 9 (33%) | 21 (33%) | 9 (20%) | 9 (21%) |
| **3** | 0 | 11 (18%) | 5 (11%) | 1(2.3%) |
| **4** | 0 | 0 | 1 (2.2%) | 1 (2.3%) |
| **5** | 0 | 0 | 0 | 1 (2.3%) |
| **Model of care most frequently worked within for initiation of insulin**  **Number (% of health professional group)** | **General practice based care** | 1 (3.6%) | 7 (11.3%) | 22 (50%) | 28 (65.1%) |  |
| **GP with a special interest in diabetes** | 0 | 0 | 3 (6.8%) | 0 |  |
| **Diabetes Nurse Educator** | 2 (7.1%) | 42 (67.7%) | 7 (15.9%) | 10 (23.3%) |  |
| **Specialist - Shared Care** | 8 (28.6%) | 1 (1.6%) | 8 (18.2%) | 3 (7.0%) |  |
| **Specialist- Outreach[[3]](#footnote-3)** | 1 (3.6%) | 0 | 0 | 2(4.7%) |  |
| **Specialist- Routine care** | 16 (57.1%) | 12 (19.4%) | 4 (9.1%) | 0 |  |

1. Two respondents stated that they worked as both DNEs and practice nurses and were classed as DNEs for the purposes of analysis given their extended training. [↑](#footnote-ref-1)
2. The Remoteness Area (RA) Classification system allows quantitative comparisons between city and rural Australia. The five RAs are: RA1- major cities, RA2-inner regional, RA3- outer regional, RA4- remote Australia and RA5- very remote [↑](#footnote-ref-2)
3. One physician indicated working most frequently in both outreach and routine care [↑](#footnote-ref-3)
